# Supplementary material
Source: publisher figshare collection journal article supplement (https://frontiersin.figshare.com/ndownloader/files/15367853)
Supplement: Supplementary file 1 [file 15367853]

| **Supplementary Table 2. Biogeographic affinities and threat status of fish species recorded in Bermuda.** Threat status follows the International Union for Conservation of Nature (IUCN). LC = Least Concern, NT = Near Threatened, NE = Not Evaluated, DD = Data Deficient. | | | | | | | | | | | | |
| --- | --- | --- | --- | --- | --- | --- | --- | --- | --- | --- | --- | --- |
|  |  | **Bermuda** | | | **Caribbean** | **W Atlantic** | **E Atlantic** | **Cosmopolitan** | **IUCN** |  | |  |
| **Species** | **Common Name** | **Native** | **New record** | **Invasive** |  |  |  |  |  | **Reported depth range (m)** | **Depths observed in the present survey** | **Depth extension** |
| *Acanthurus chirurgus/bahianus* | Doctorfish/Ocean surgeon | ✓ |  |  | ✓ | ✓ | ✓ |  | LC | 0-70 | 17-63 |  |
| *Acanthurus coeruleus* | Blue tang surgeonfish | ✓ |  |  | ✓ | ✓ | ✓ |  | LC | 0-70 | 31 |  |
| *Aulostomus maculatus* | Trumpetfish | ✓ |  |  | ✓ | ✓ |  |  | LC | 2-50 | 31 |  |
| *Bodianus rufus* | Spanish hogfish | ✓ |  |  | ✓ | ✓ |  |  | LC | 1-100 | 17-90 |  |
| *Cantherhines macrocerus* | American whitespotted filefish | ✓ |  |  | ✓ | ✓ | ✓ |  | LC | 2-50 | 55-93 | Yes |
| *Canthigaster rostrata* | Caribbean sharpnose-puffer | ✓ |  |  | ✓ | ✓ |  |  | LC | 1-98 | 18-93 |  |
| *Caranx lugubris* | Black jack | ✓ |  |  | ✓ | ✓ | ✓ | ✓ | LC | 3-380 | 186-250 |  |
| *Cephalopholis fulva* | Coney | ✓ |  |  | ✓ | ✓ |  |  | LC | 1-150 | 15-93 |  |
| *Chaetodon capistratus* | Foureye butterflyfish | ✓ |  |  | ✓ | ✓ |  |  | LC | 2-100 | 15-31 |  |
| *Chaetodon ocellatus* | Spotfin butterflyfish | ✓ |  |  | ✓ | ✓ |  |  | LC | 0-70 | 15-30 |  |
| *Chaetodon sedentarius* | Reef butterflyfish | ✓ |  |  | ✓ | ✓ |  |  | LC | 0-105 | 18-93 |  |
| *Chaetodon striatus* | Banded butterflyfish | ✓ |  |  | ✓ | ✓ | ✓ |  | LC | 0-55 | 28-30 |  |
| *Chloroscombrus chrysurus* | Atlantic bumper | ✓ |  |  | ✓ | ✓ | ✓ |  | LC | 0-110 | 60 |  |
| *Chromis bermudae* | Yellowfin chromis | ✓ |  |  |  |  |  |  | LC | 50-61 | 60-63 | Marginal |
| *Chromis cyanea* | Blue chromis | ✓ |  |  | ✓ | ✓ |  |  | LC | 3-70 | 28-30 |  |
| *Chromis enchrysura* | Yellowtail reeffish | ✓ |  |  | ✓ | ✓ | ✓ |  | LC | 5-200 | 61-92 |  |
| *Clepticus parrae* | Creole wrasse | ✓ |  |  | ✓ | ✓ |  |  | LC | 0-100 | 17-62 |  |
| *Cookeolus japonicus* | Longfinned bullseye | ✓ |  |  | ✓ | ✓ | ✓ | ✓ | LC | 40-400 | 90-93 |  |
| *Gephyroberyx darwinii* | Darwin's slimehead |  | ✓ |  | ✓ | ✓ | ✓ | ✓ | LC | 9-1250 | 299-301 |  |
| *Haemulon flavolineatum* | French grunt | ✓ |  |  | ✓ | ✓ |  |  | LC | 0-160 | 18-31 |  |
| *Halichoeres garnoti* | Yellowhead wrasse | ✓ |  |  | ✓ | ✓ |  |  | LC | 1-90 | 15-31 |  |
| *Holacanthus bermudensis* | Angelfish | ✓ |  |  | ✓ | ✓ |  |  | LC | 2-92 | 15-201 | Yes |
| *Holacanthus tricolor* | Rock beauty | ✓ |  |  | ✓ | ✓ |  |  | LC | 1-135 | 28-92 |  |
| *Holocentrus adscensionis* | Squirrelfish | ✓ |  |  | ✓ | ✓ | ✓ |  | LC | 0-240 | 61-150 |  |
| *Holocentrus rufus* | Longspine squirrelfish | ✓ |  |  | ✓ | ✓ |  |  | LC | 0-330 | 30 |  |
| *Kyphosus incisor/sectatrix* | Yellow / Bermuda sea chub | ✓ |  |  | ✓ | ✓ | ✓ |  | LC | 0-40 | 15-93 | Yes |
| *Lutjanus griseus* | Grey snapper | ✓ |  |  | ✓ | ✓ |  |  | LC | 1-180 | 17-30 |  |
| *Melichthys niger* | Black triggerfish | ✓ |  |  | ✓ | ✓ | ✓ | ✓ | LC | 0-75 | 28-55 |  |
| *Mustelus canis insularis* | Smooth-hound | ✓ |  |  | ✓ | ✓ |  |  | NT | 0-800 | 243 |  |
| *Ocyurus chrysurus* | Yellowtail snapper | ✓ |  |  | ✓ | ✓ |  |  | DD | 0-180 | 31 |  |
| *Ostichthys trachypoma* | Bigeye soldierfish |  | ✓ |  | ✓ | ✓ |  |  | LC | 37-550 | 304-305 |  |
| *Paranthias furcifer* | Creole fish | ✓ |  |  | ✓ | ✓ | ✓ |  | LC | 0-128 | 55-93 |  |
| *Pontinus castor* | Longsnout scorpionfish | ✓ |  |  | ✓ | ✓ |  |  | LC | 45-400 | 243-305 |  |
| *Pristigenys alta* | Short bigeye | ✓ |  |  | ✓ | ✓ |  |  | LC | 5-300 | 147-301 | Marginal |
| *Prognathodes* cf. *guyanensis* | French butterflyfish |  | ✓ |  | ✓ | ✓ |  |  | LC | 60-250 | 90-302 | Yes |
| *Pronotogrammus* cf. *martinicensis* | Roughtongue bass | ✓ |  |  | ✓ | ✓ |  |  | LC | 35-900 | 136-305 |  |
| *Pseudocaranx dentex* | White trevally | ✓ |  |  | ✓ | ✓ | ✓ | ✓ | LC | 0-238 | 61 |  |
| *Pterois miles/volitans* | Lionfish |  |  | ✓ | ✓ | ✓ | ✓ | ✓ | NE | 2-304*** | 15-301 |  |
| *Scarus coeruleus* | Blue parrotfish | ✓ |  |  | ✓ | ✓ |  |  | LC | 2-55 | 15-31 |  |
| *Scarus iseri* | Striped parrotfish | ✓ |  |  | ✓ | ✓ |  |  | LC | 0-60 | 17-31 |  |
| *Scarus taeniopterus* | Princess parrotfish | ✓ |  |  | ✓ | ✓ |  |  | LC | 1-110 | 15-63 |  |
| *Scarus vetula* | Queen parrotfish | ✓ |  |  | ✓ | ✓ |  |  | LC | 1-30 | 15-30 |  |
| *Seriola rivoliana* | Longfin yellowtail | ✓ |  |  | ✓ | ✓ | ✓ | ✓ | LC | 3-250 | 61-251 | Marginal |
| *Serranus phoebe* | Tattler | ✓ |  |  | ✓ | ✓ |  |  | LC | 26-402 | 136-305 |  |
| *Sparisoma aurofrenatum* | Redband parrotfish | ✓ |  |  | ✓ | ✓ |  |  | LC | 1-70 | 17-31 |  |
| *Sparisoma chrysopterum* | Redtail parrotfish | ✓ |  |  | ✓ | ✓ |  |  | LC | 1-30 | 31 | Marginal |
| *Sparisoma rubripinne* | Redfin parrotfish | ✓ |  |  | ✓ | ✓ |  |  | LC | 0-30 | 18-60 | Yes |
| *Sparisoma viride* | Stoplight parrotfish | ✓ |  |  | ✓ | ✓ |  |  | LC | 0-60 | 17-62 | Marginal |
| *Squalus cubensis* | Cuban dogfish |  | ✓ |  | ✓ | ✓ |  |  | DD | 60-710 | 185-201 |  |
| *Thalassoma bifasciatum* | Bluehead | ✓ |  |  | ✓ | ✓ |  |  | LC | 0-53 | 15-31 |  |
| *Xanthichthys ringens* | Sargassum triggerfish | ✓ |  |  | ✓ | ✓ |  |  | LC | 0-190 | 55 |  |

***Note that species has recently been recorded at depths up to 304 m in Bermuda by Gress et al. 2017.

Gress E, Andradi-Brown DA, Woodall L, Schofield PJ, Stanley K, Rogers AD. Lionfish (*Pterois* spp.) invade the upper bathyal zone in the western Atlantic. *Peerj* **5**, e3683 (2017).
